# Supplementary material for: A microporous, amino acid functionalized Zn(ii)-organic framework nanoflower for selective CO2capture and solvent encapsulation
Source: Royal Society of Chemistry journal article supplement (doi:10.1039/d0ma00481b), 2020-01-01
Supplement: d0ma00481b1.pdf [file d0ma00481b1.pdf]

## **Electronic Supplementary Information**

### **A microporous, amino acid functionalized Zn(II)-organic framework nanoflower for selective CO<sub>2</sub> capture and solvent encapsulation<sup>†</sup>**

Shradha Gandhi, Prasenjit Das and Sanjay K Mandal\*

*Department of Chemical Sciences, Indian Institute of Science Education and Research  
Mohali, Sector 81, Manauli PO, S.A.S. Nagar, Mohali, Punjab 140306, INDIA*

#### **Corresponding Author**

\*E-mail: [sanjaymandal@iisermohali.ac.in](mailto:sanjaymandal@iisermohali.ac.in)

## Table of Contents

| Item(s)      | Description                                                                                                                                                                                                | Page No. |
|--------------|------------------------------------------------------------------------------------------------------------------------------------------------------------------------------------------------------------|----------|
| Scheme S1    | Synthesis of H <sub>3</sub> (D-2,4-cbs)                                                                                                                                                                    | S3       |
| Fig. S1-S4   | Characterization of H <sub>3</sub> (D-2,4-cbs): FTIR spectrum, TGA, <sup>1</sup> H NMR and Mass spectra                                                                                                    | S4-S5    |
| Fig. S5-S10  | Characterization of <b>Zn-CBS</b> : FTIR spectrum, Solid-state reflectance spectrum, TGA, PXRD pattern, 2D WAX map and EDX analysis                                                                        | S6-S8    |
| Fig. S11     | Analysis of sorption isotherms and N <sub>2</sub> sorption isotherm of <b>Zn-CBS</b>                                                                                                                       | S9       |
| Fig. S12     | PXRD patterns of before and after gas adsorption of <b>Zn-CBS</b>                                                                                                                                          | S10      |
|              | Calculation of Isothermic heats of adsorption                                                                                                                                                              | S11      |
| Table S1     | Literature survey of BET surface area, H <sub>2</sub> , N <sub>2</sub> , CO <sub>2</sub> and CH <sub>4</sub> uptake, isosteric heat of adsorption for N <sub>2</sub> , CO <sub>2</sub> and CH <sub>4</sub> | S12-S13  |
| Fig. S13-S21 | CO <sub>2</sub> selectivity over N <sub>2</sub> and CH <sub>4</sub> : Dual-site Langmuir-Freundlich plots                                                                                                  | S14-S19  |
| Table S2     | Summary of DSLF model fit                                                                                                                                                                                  | S20      |
| Table S3     | Literature survey for the selectivity of CO <sub>2</sub> /N <sub>2</sub> and CO <sub>2</sub> /CH <sub>4</sub>                                                                                              | S21      |
|              | DFT calculation and CBMC molecular simulation                                                                                                                                                              | S22      |
| Table S4     | Encapsulation of solvents by <b>Zn-CBS</b>                                                                                                                                                                 | S23      |

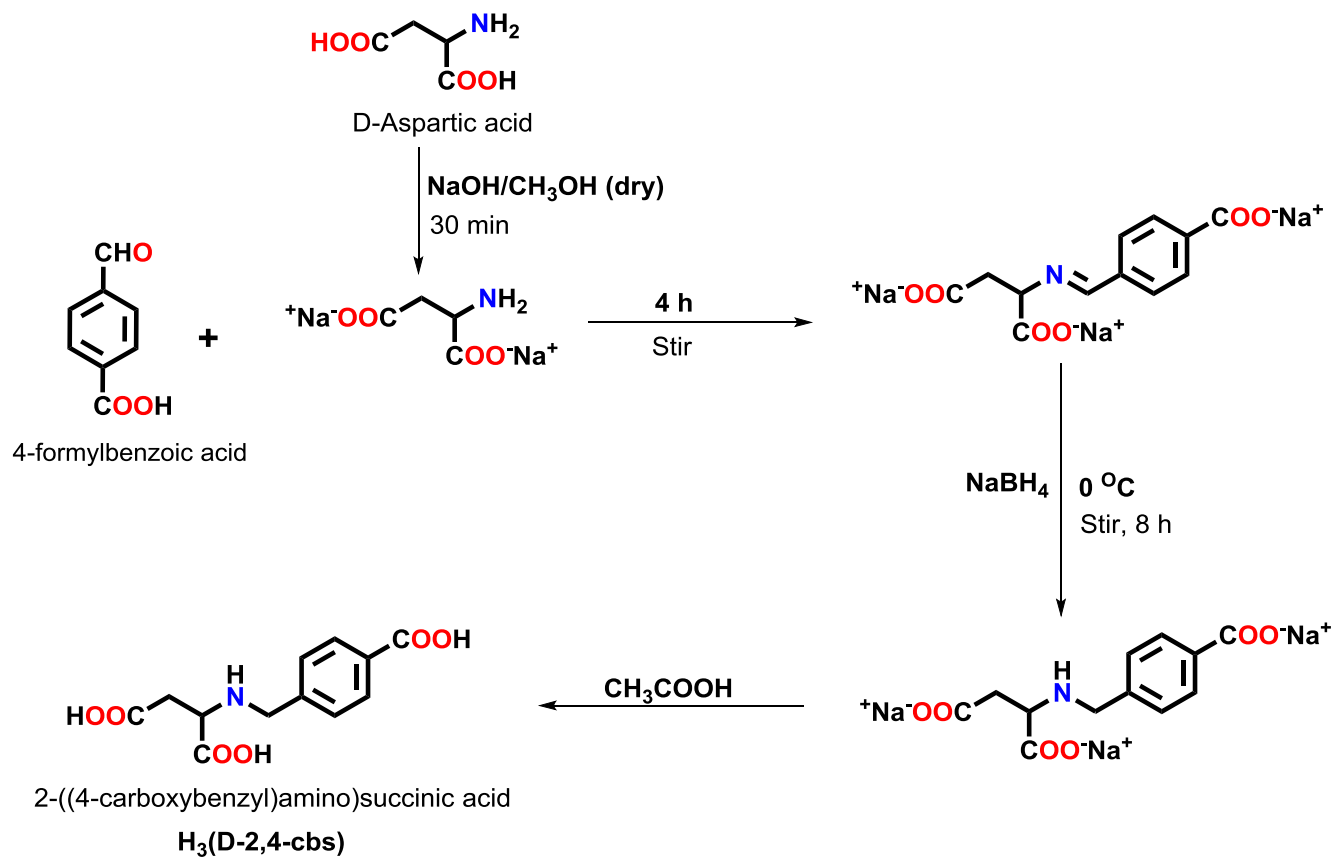

**Scheme S1.** Synthesis of H<sub>3</sub>(D-2,4-cbs).

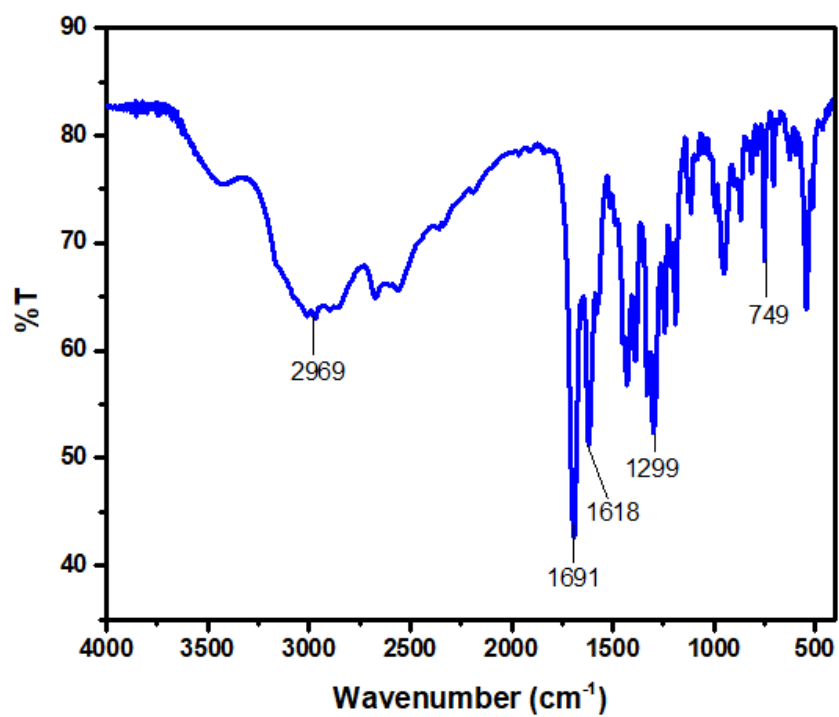

Fig. S1 FTIR spectrum of H<sub>3</sub>(D-2,4-cbs).

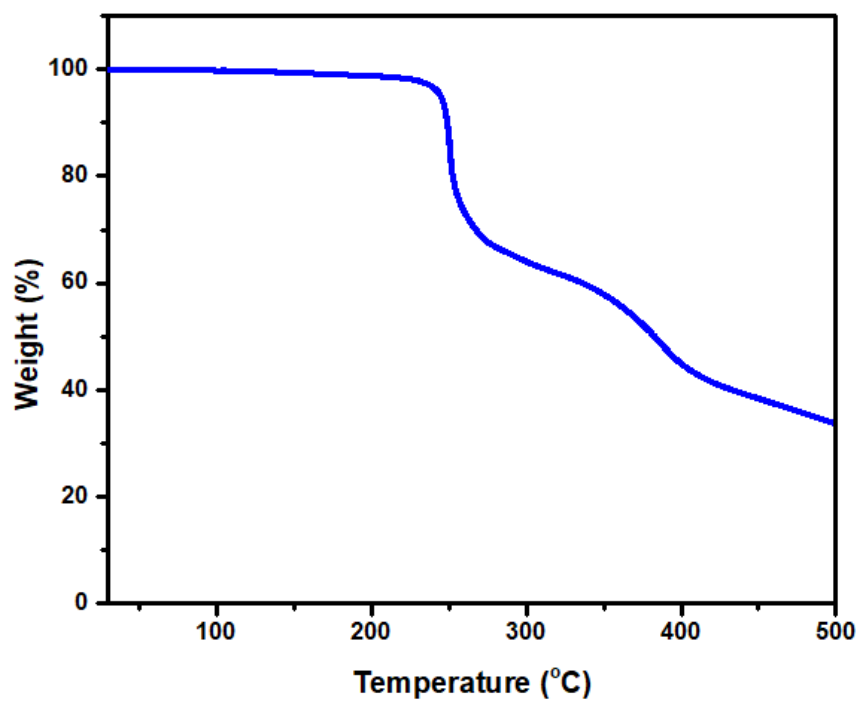

Fig. S2 TGA profile of H<sub>3</sub>(D-2,4-cbs).

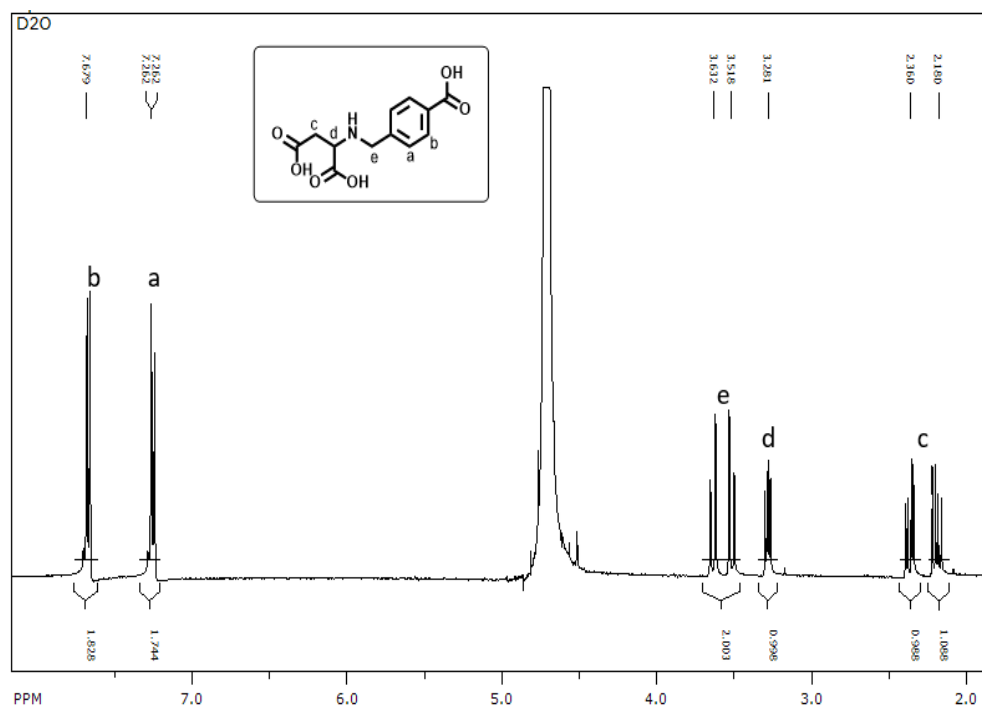

**Fig. S3** <sup>1</sup>H NMR spectrum of H<sub>3</sub>(D-2,4-cbs) in D<sub>2</sub>O.

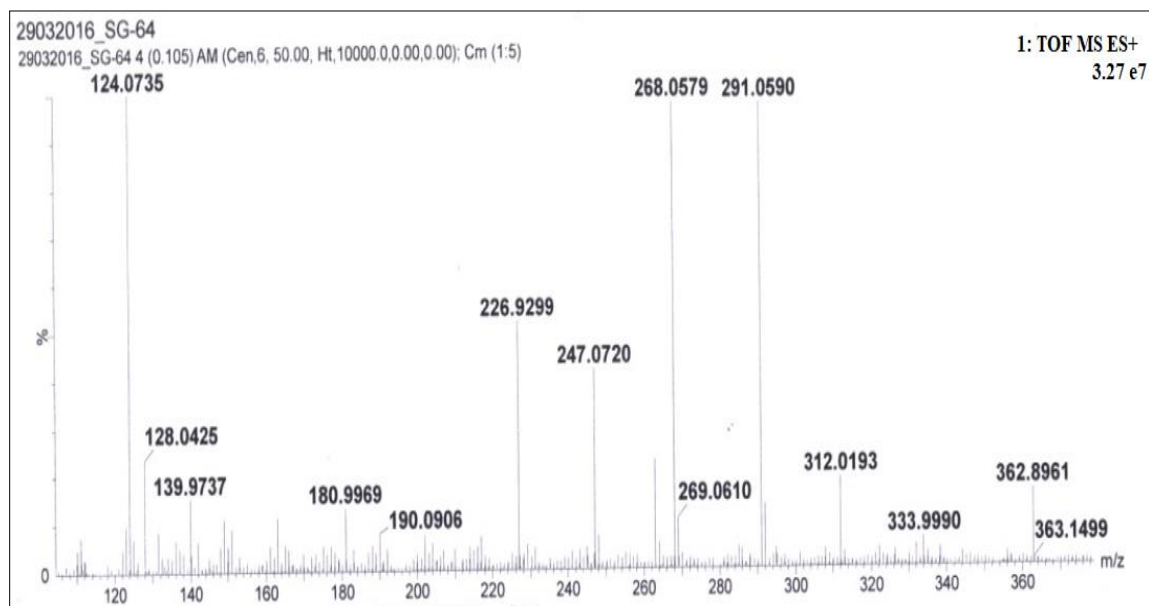

**Fig. S4** HRMS of H<sub>3</sub>(D-2,4-cbs).

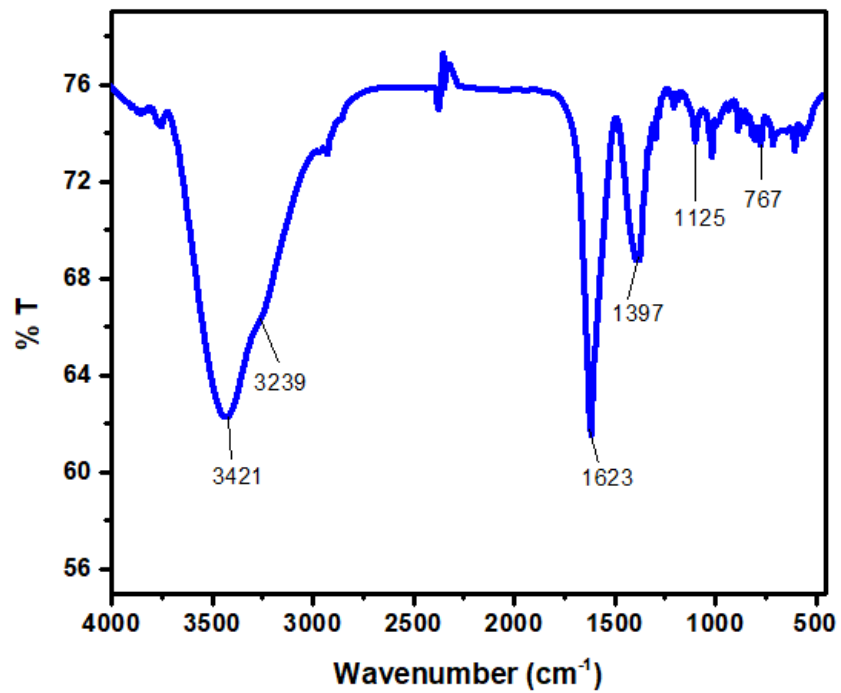

Fig. S5 FTIR spectrum of Zn-CBS.

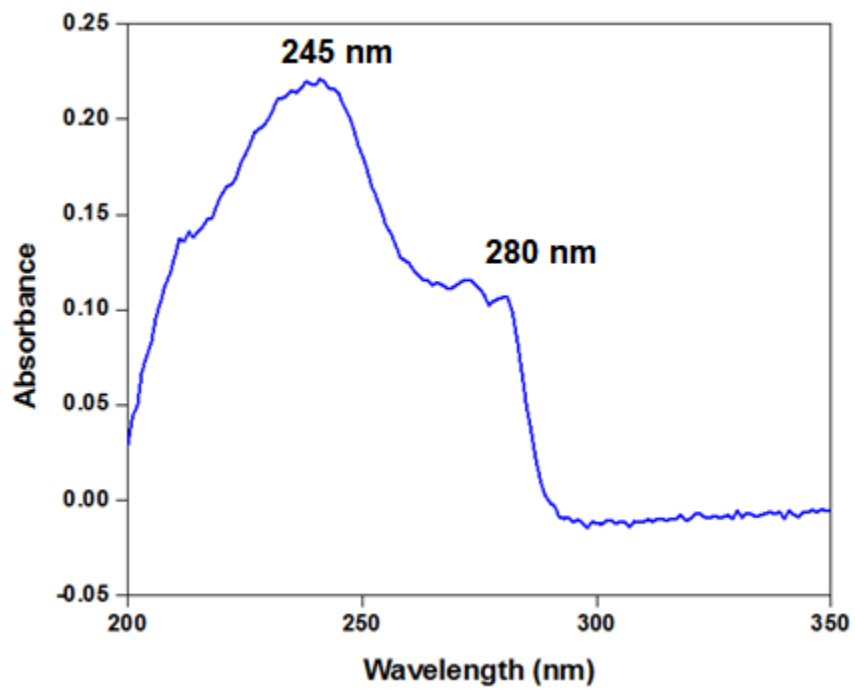

Fig. S6 Solid State diffuse reflectance spectrum of Zn-CBS.

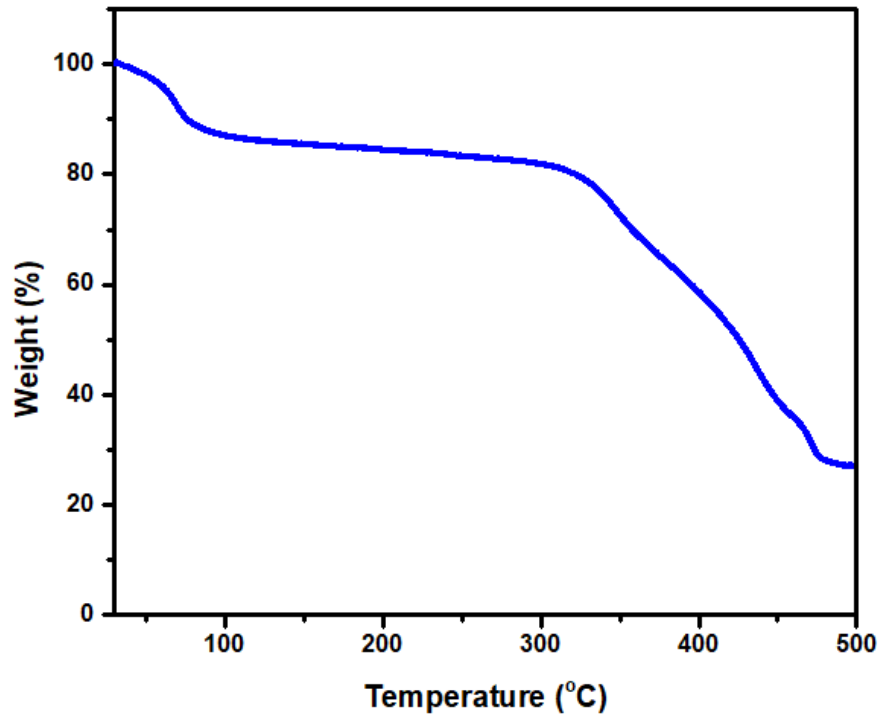

Fig. S7 TGA profile of Zn-CBS.

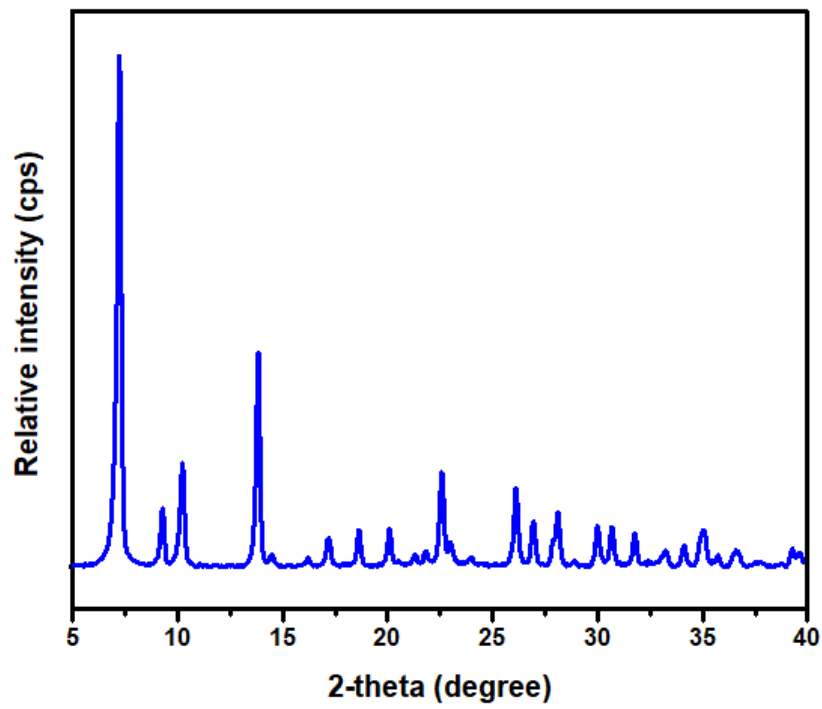

Fig. S8 PXRD pattern of Zn-CBS.

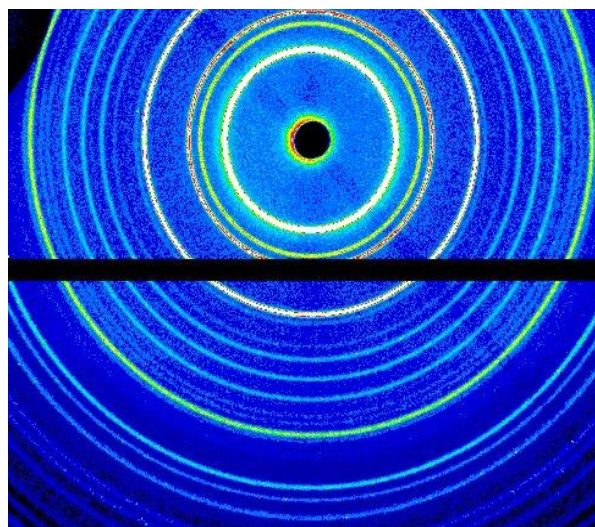

**Fig. S9** 2D WAX Map of Zn-CBS.

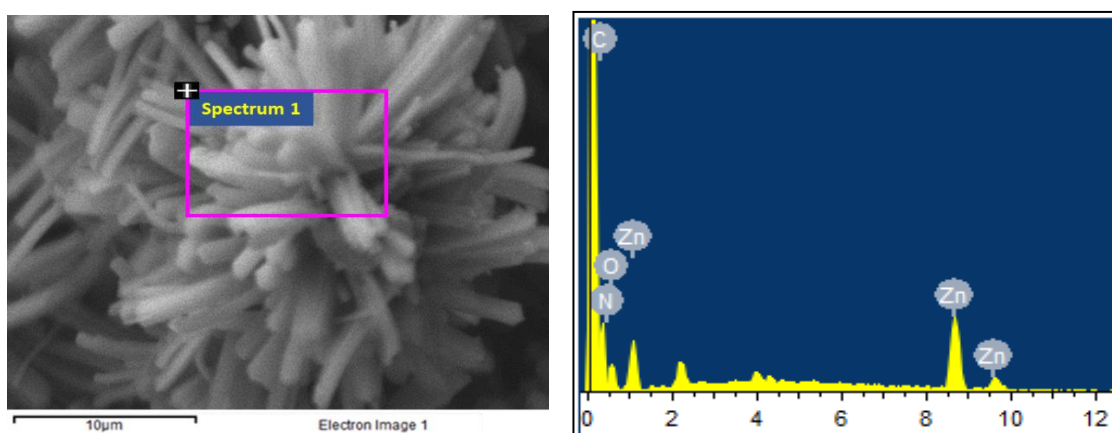

| Element | Weight (%) | Atomic (%) |
|---------|------------|------------|
| C K     | 33.5       | 47.5       |
| N K     | 15.4       | 18.8       |
| O K     | 25.5       | 27.1       |
| Zn K    | 25.6       | 6.6        |
| Total   | 100        |            |

**Fig. S10** EDX analysis of Zn-CBS.



## Analysis of Sorption Isotherm

For this analysis, the BET equation is considered:

$$v = cv_m x / (1-x)[1 + (c-1)x]$$

where,  $x = p/p_0$ ,  $v$  is the volume of nitrogen adsorbed per gram of **Zn-CBS** at STP,  $v_m$  is the monolayer capacity, and  $c$  is related to the heat of adsorption. It is noted that the line is fit to the low pressure isotherm data with range  $0.05 < x < 0.3$ .

The surface area is then calculated from:  $A = v_m \sigma_0 N_{av}$

where,  $\sigma_0$  is the cross-sectional area of nitrogen at liquid density (16.2 Å) and  $N_{av}$  is Avogadro's number.

These calculations are done through the "BET analysis" and "Langmuir analysis" function embedded in the Belsorp Adsorption/Desorption Data Analysis software version 6.3.1.0.

Pore size was calculated using microporous (MP) analysis method embedded in the Belsorp Adsorption/Desorption Data Analysis software.

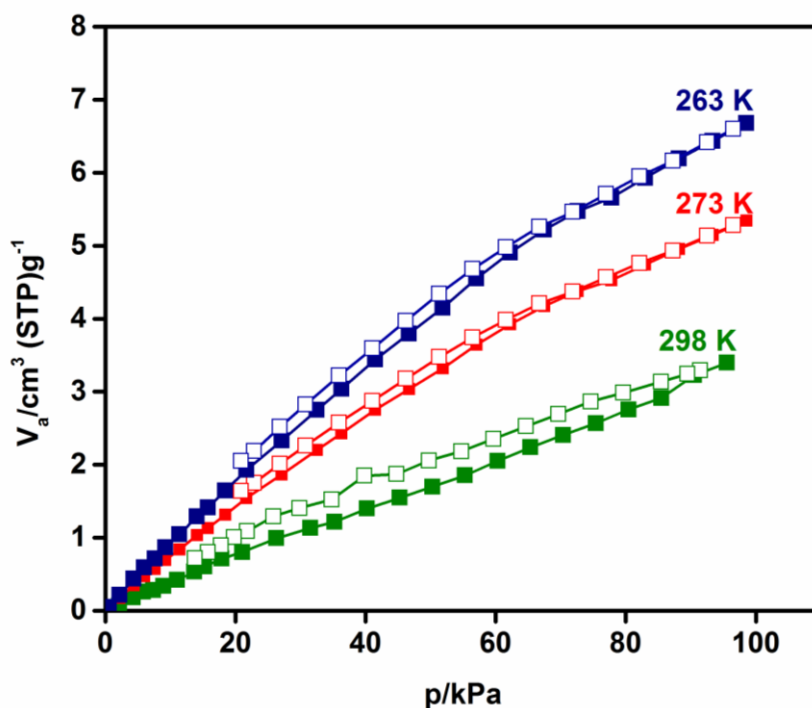

**Fig. S11** N<sub>2</sub> sorption isotherms of **Zn-CBS** at 263 K, 273 K and 298 K.

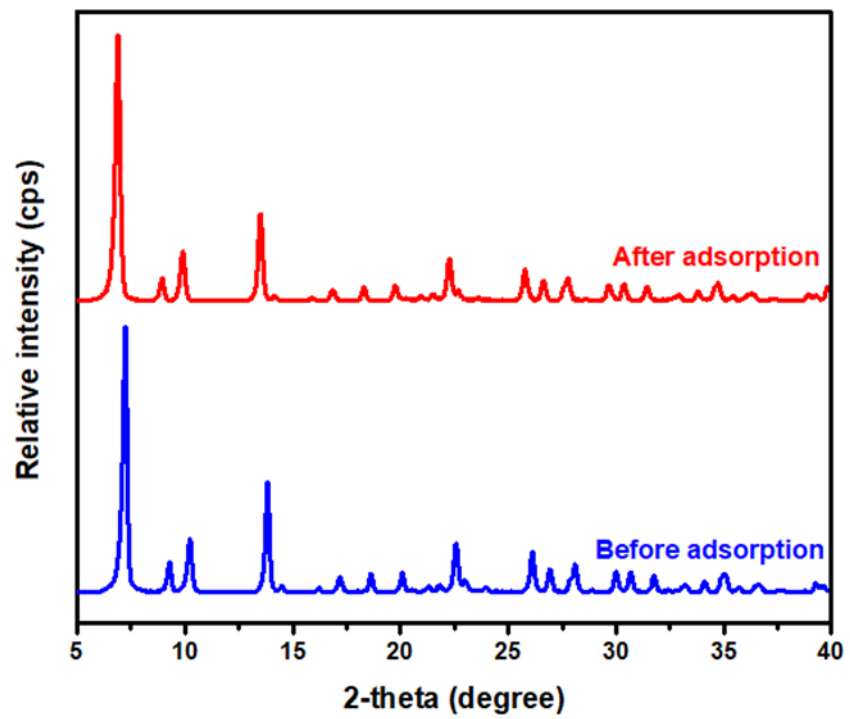

Fig. S12 PXRD pattern of before and after gas adsorption.

### **Calculation of Isothermic Heats of Adsorption:**

#### Using the Clausius-Clapeyron equation

Isothermic heats of adsorption ( $Q_{st}$ ) were calculated using the Clausius-Clapeyron equation based on pure-component isotherms collected at two different temperatures of 273 K and 298 K.  $Q_{st}$  is defined as:

$$Q_{st} = -R(\partial \ln x / \partial (1/T))_y$$

where,  $x$  is the pressure,  $T$  is the temperature,  $R$  is the gas constant and  $y$  is the adsorption amount.

These calculations are done through the “Heat of Adsorption” function embedded in the Belsorp Adsorption/Desorption Data Analysis software version 6.3.1.0.

**Table S1.** Comparison of BET surface area, H<sub>2</sub>, N<sub>2</sub>, CO<sub>2</sub> and CH<sub>4</sub> uptake, isosteric heat of adsorption for N<sub>2</sub>, CO<sub>2</sub> and CH<sub>4</sub> with literature reports.

| Complex                                      | BET surface area (m <sup>2</sup> g <sup>-1</sup> ) | H <sub>2</sub> uptake at 77 K | N <sub>2</sub> uptake |       |       | CO <sub>2</sub> uptake |              |       |       | CH <sub>4</sub> uptake |       |       | Q <sub>st</sub> N <sub>2</sub> | Q <sub>st</sub> CO <sub>2</sub> | Q <sub>st</sub> CH <sub>4</sub> | Ref.                                               |
|----------------------------------------------|----------------------------------------------------|-------------------------------|-----------------------|-------|-------|------------------------|--------------|-------|-------|------------------------|-------|-------|--------------------------------|---------------------------------|---------------------------------|----------------------------------------------------|
|                                              |                                                    |                               | 298 K                 | 273 K | 263 K | 298 K                  | 273 K        | 263 K | 195 K | 298 K                  | 273 K | 263 K |                                |                                 |                                 |                                                    |
| Zn-CBS                                       | 282                                                | 64                            | 4.1                   | 6.6   | 8.3   | 38.7                   | 47.5         | 49.3  | 85.9  | 15.1                   | 21.2  | 24.8  | 0.7                            | 35                              | 51.8                            | This work                                          |
| [[Cd(ATAIA)]·4H <sub>2</sub> O] <sub>n</sub> | 62                                                 | 20.12                         |                       |       |       | 17.1                   | 24.3         |       |       |                        |       |       |                                | 37.5                            |                                 | ACS Appl. Mat. Int., 2018, <b>10</b> , 25360-25371 |
| TEA@bio-MOF-1                                | 1220                                               |                               |                       |       |       |                        | 4.16 mmol/g  |       |       |                        |       |       |                                | 26.5                            |                                 | JACS, 2010, <b>132</b> , 5578                      |
| TMA@bio-MOF-1                                | 1460                                               |                               |                       |       |       |                        | 4.446 mmol/g |       |       |                        |       |       |                                | 23.9                            |                                 |                                                    |
| CPF-13                                       |                                                    | 223.9                         |                       |       |       | 81                     | 116          |       |       |                        |       |       |                                | 28.3                            |                                 | Chem. Mater., 2012, <b>24</b> , 2624-2626          |
| JUC-141                                      | 1057                                               |                               | 6.76                  | 13.9  |       | 51.3                   | 79.9         |       |       | 21.8                   | 37.8  |       | 27.2                           | 27.8                            | 22.7                            | Inorg. chem., 2017, <b>56</b> , 6938-6942          |
| MAF-2                                        |                                                    |                               |                       |       |       | 19                     | 49           |       |       |                        |       |       |                                | 27                              |                                 | JACS, 2009, <b>131</b> , 5516-5521                 |
| [Zn(atz) <sub>2</sub> ]                      | 1014                                               |                               | 29.4                  | 50.1  |       | 99                     | 140          |       |       |                        |       |       |                                | 26                              | 19.5                            | Inorg. Chem. 2012, <b>51</b> , 9950-9955           |

|                                                                                             |                  |  |                                     |      |  |                            |                            |  |                           |                             |                            |  |     |      |                            |                                                                     |
|---------------------------------------------------------------------------------------------|------------------|--|-------------------------------------|------|--|----------------------------|----------------------------|--|---------------------------|-----------------------------|----------------------------|--|-----|------|----------------------------|---------------------------------------------------------------------|
| Zn <sub>2</sub> (BDC) <sub>2</sub> (DABCO)                                                  | 1725             |  |                                     |      |  | 13.7                       |                            |  |                           | 5.3                         |                            |  |     | 20   |                            | <i>Microporous and mesoporous material</i> , 2010, <b>132</b> , 305 |
| $((\text{CH}_3)_2\text{NH}_2)_{1.5} [\text{Zn}_3\text{L}_2(\text{HCOO})_{1.5}]_x\text{DMF}$ | 153.4            |  |                                     | 8.93 |  |                            | 57.5                       |  |                           |                             | 2.48                       |  |     |      |                            | <i>J. Mater. Chem. A</i> , 2014, <b>2</b> , 17771-17778             |
| SNU-150, SNU-77S, SNU-151, and SNU-100                                                      | 1563, 3670, 1852 |  | 0.546, 0.40, 0.519, and 0.624 (wt%) |      |  | 6.09, 3.94, 14.1, and 14.1 | 12.0, 8.21, 22.2, and 19.9 |  | 78.6, 169, 67.8, and 45.2 | 0.859, 0.62, 1.24, and 1.41 | 1.29, 1.20, 2.00, and 2.56 |  |     |      | 12.8, 14.3, 18.2, and 26.5 | <i>Chem. Eur. J.</i> , 2013, <b>19</b> , 17432-17438                |
| IITKGP-5                                                                                    | 366              |  | 4                                   | 5.5  |  | 49                         | 56.4                       |  |                           | 13.6                        | 17                         |  | 4.6 | 22.6 | 14.8                       | <i>Dalton Trans.</i> , 2017, <b>46</b> , 15280-15286                |
| IITKGP-6                                                                                    | 83.4             |  | 4.1                                 | 6.2  |  | 37.4                       | 50.6                       |  |                           | 9.2                         | 13.8                       |  | 5.1 | 23   | 18.4                       | <i>Inorg. Chem.</i> , 2017, <b>56</b> , 13991-13997                 |
| IISERP-MOF20                                                                                | 945              |  |                                     |      |  | 3.5                        |                            |  | 9 mmol/g                  |                             |                            |  |     | 26   |                            | <i>Inorg. Chem.</i> , 2018, <b>57</b> , 5267-5272                   |

### CO<sub>2</sub> selectivity over N<sub>2</sub> and CH<sub>4</sub> - IAST selectivity calculation for CO<sub>2</sub>/N<sub>2</sub> and CO<sub>2</sub>/CH<sub>4</sub> mixture:

Gas selectivity for mixture of CO<sub>2</sub>/N<sub>2</sub> (15:85) and CO<sub>2</sub>/CH<sub>4</sub> (50:50) at different temperature were calculated based on the ideal absorbed solution theory (IAST) proposed by Myers and Prausnitz.<sup>S1</sup> In order to calculate the selective sorption ability of **Zn-CBS** towards the separation of binary mixed gases, the parameter fitted from the single component CO<sub>2</sub> and N<sub>2</sub> and CH<sub>4</sub> adsorption based on the Dual-Site Langmuir-Freundlich (DSLFL) model and different parameter were used given below.

$$y = \frac{q_{m1} b_1 p^{n1}}{1 + b_1 p^{n1}} + \frac{q_{m2} b_2 p^{n2}}{1 + b_2 p^{n2}}$$

where, p is the pressure of the bulk gas at equilibrium with the adsorbed phase (kPa); y is the adsorbed amount per mass of adsorbent (mmol/g), q<sub>m1</sub> and q<sub>m2</sub> are the saturation capacities of sites 1 and 2 (mmol/g); b<sub>1</sub> and b<sub>2</sub> are the affinity coefficients of sites 1 and 2, n<sub>1</sub> and n<sub>2</sub> represent the deviation from an ideal homogeneous surface.

The predicted adsorption selectivity is defined as

$$S = \left( \frac{\frac{x_1}{y_1}}{\frac{x_2}{y_2}} \right)$$

where, x<sub>i</sub> and y<sub>i</sub> are the mole fractions of component 1 (i = 1, 2) in the adsorbed and bulk phases, respectively. The IAST calculation was carried out for a binary mixture containing 15% CO<sub>2</sub> (y<sub>1</sub>) and 85% N<sub>2</sub> (y<sub>2</sub>) and 50% CO<sub>2</sub> (y<sub>1</sub>) and 50% CH<sub>4</sub> (y<sub>2</sub>), which is typical for flue gases and landfill gases, respectively.

(S1) A. L. Myers and J. M. Prausnitz, *AIChE J.*, 1965, **11**, 121-127.

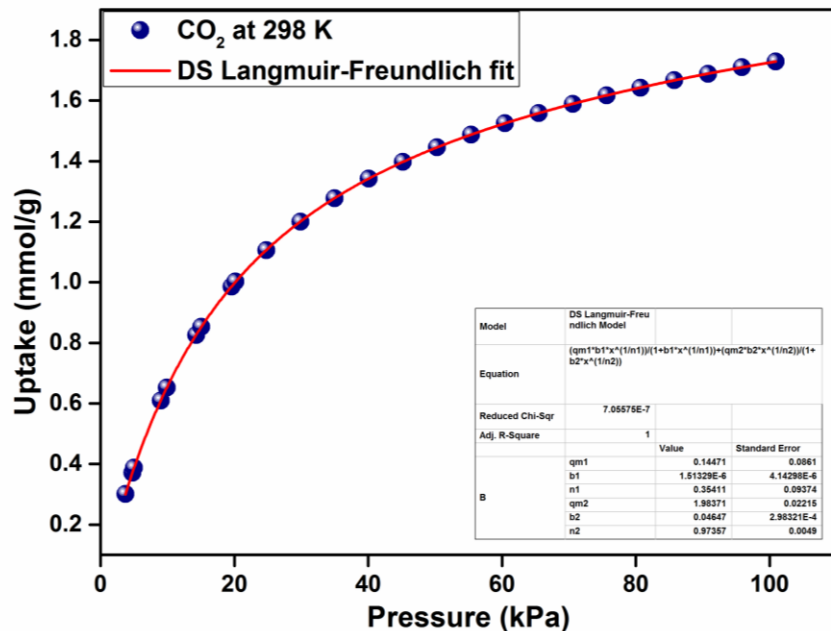

Fig. S13 Dual-site Langmuir-Freundlich fitted (red line) for CO<sub>2</sub> (blue circle) isotherm measure at 298 K.

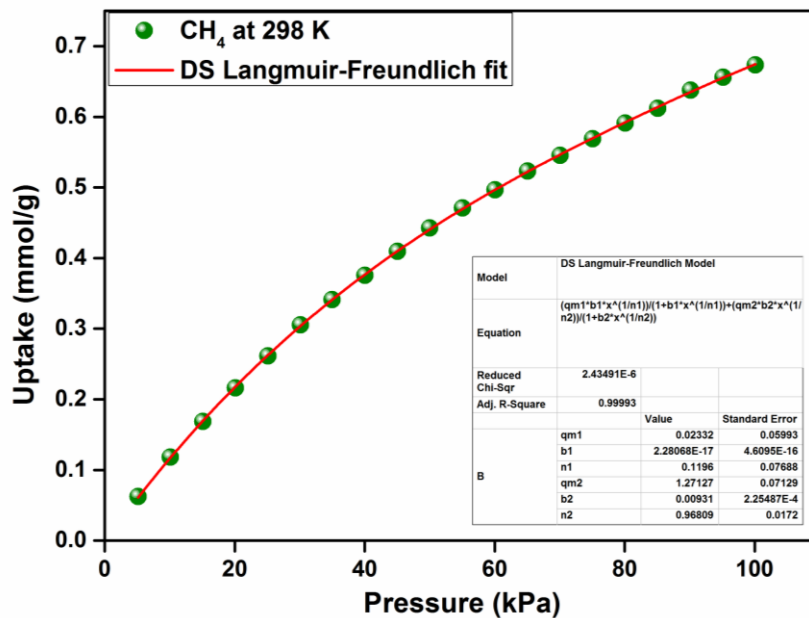

Fig. S14 Dual-site Langmuir-Freundlich fitted (red line) for CH<sub>4</sub> (green circle) isotherm measure at 298 K.

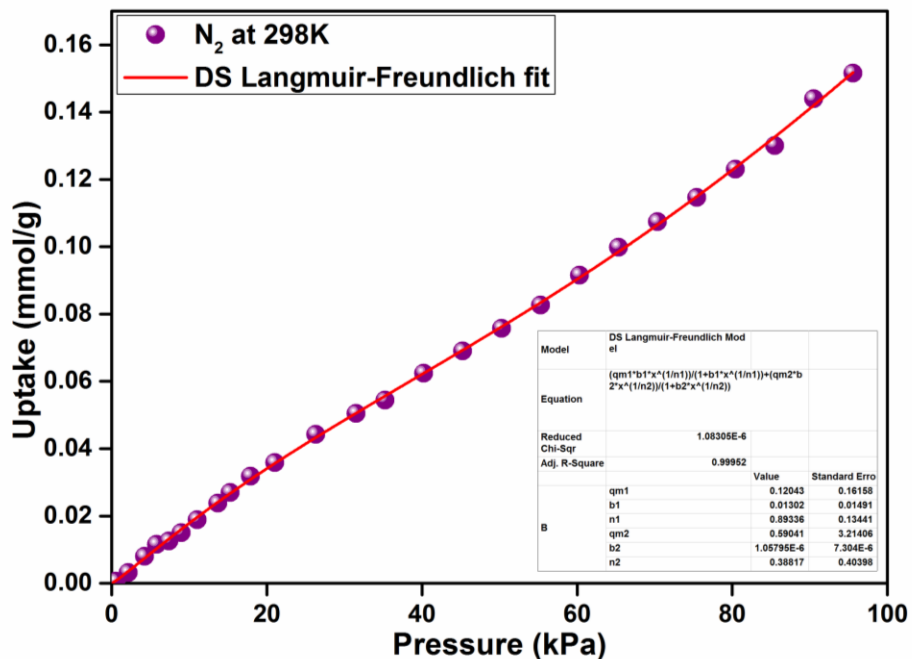

Fig. S15 Dual-site Langmuir-Freundlich fitted (red line) for N<sub>2</sub> (violet circle) isotherm measure at 298 K.

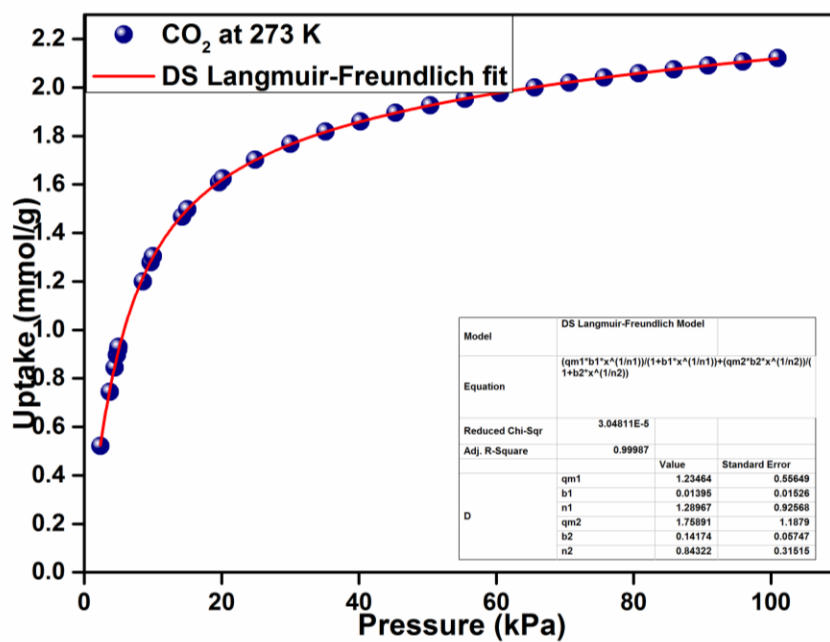

Fig. S16 Dual-site Langmuir-Freundlich fitted (red line) for CO<sub>2</sub> (blue circle) isotherm measure at 273 K.



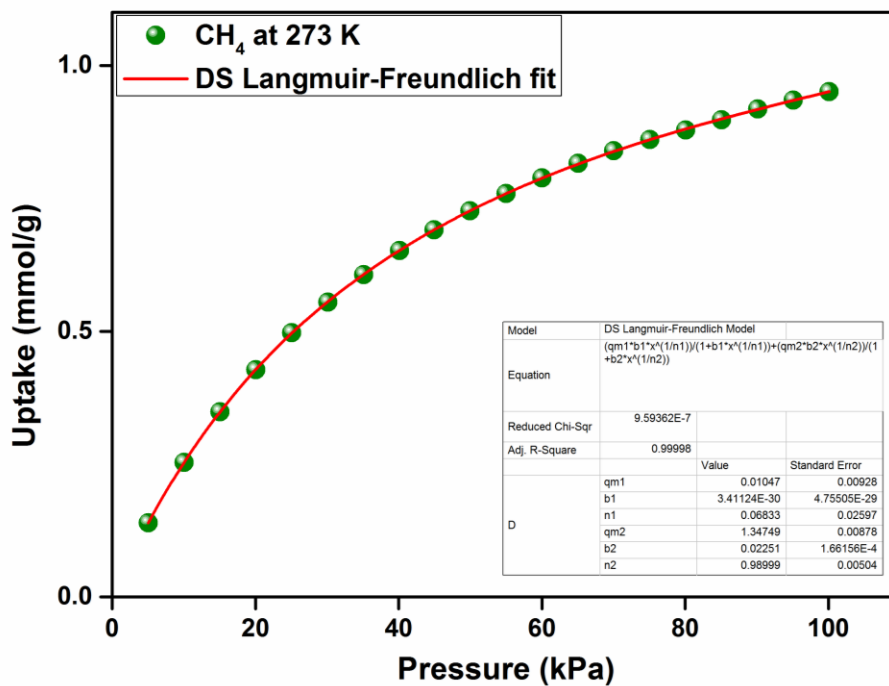

Fig. S17 Dual-site Langmuir-Freundlich fitted (red line) for CH<sub>4</sub> (green circle) isotherm measure at 273 K.

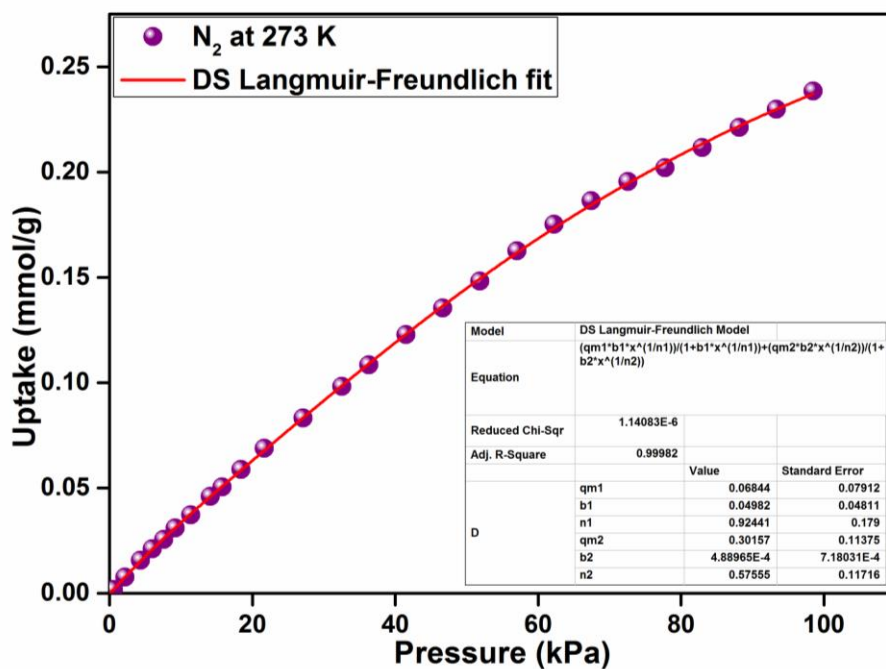

Fig. S18 Dual-site Langmuir-Freundlich fitted (red line) for N<sub>2</sub> (violet circle) isotherm measure at 273 K.

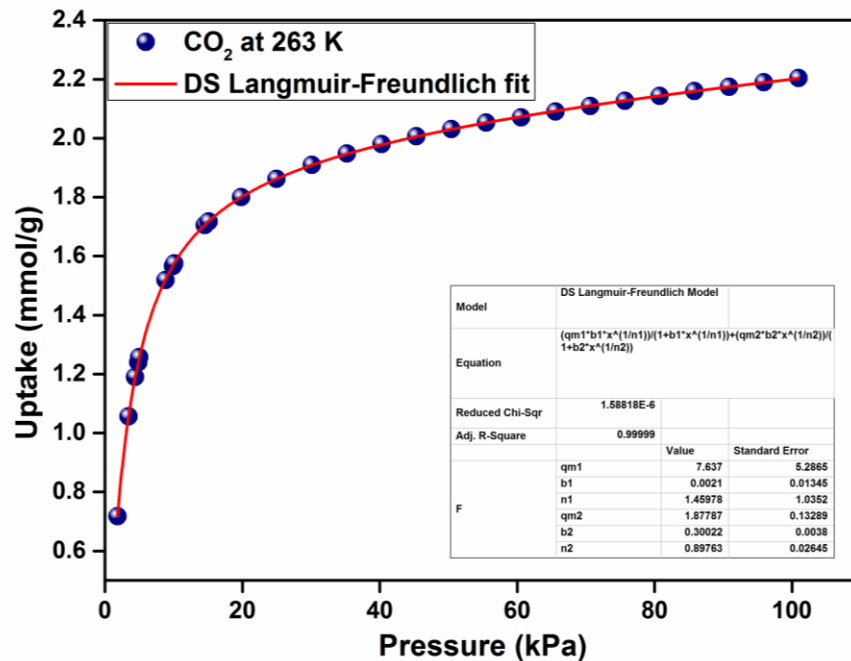

Fig. S19 Dual-site Langmuir-Freundlich fitted (red line) for CO<sub>2</sub> (blue circle) isotherm measure at 263 K.

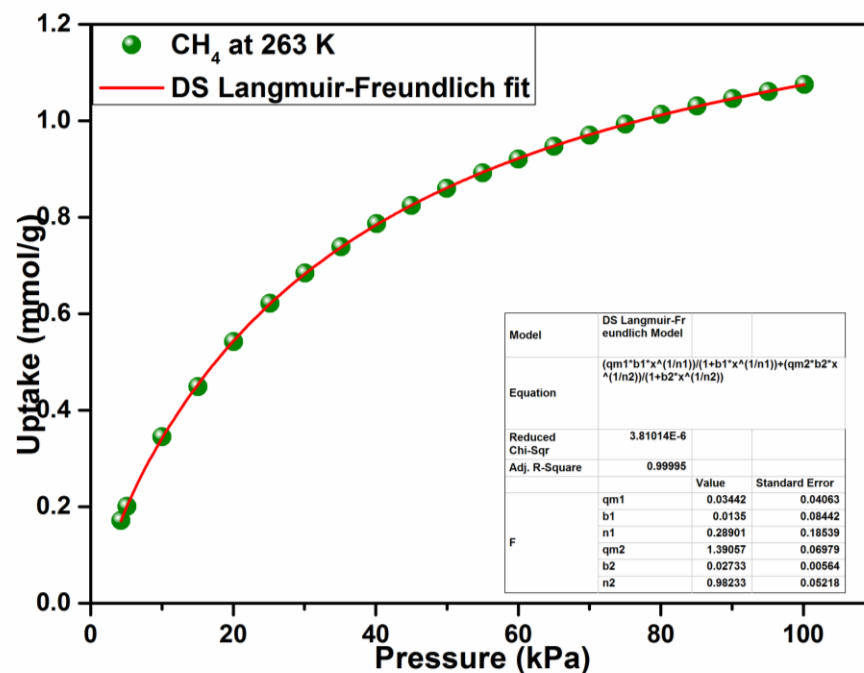

Fig. S20 Dual-site Langmuir-Freundlich fitted (red line) for CH<sub>4</sub> (green circle) isotherm measure at 263 K.

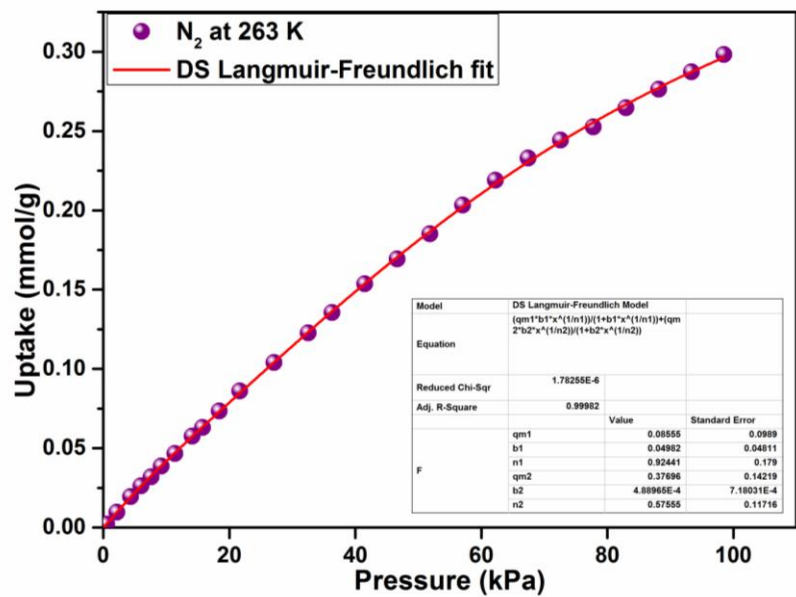

**Fig. S21** Dual-site Langmuir-Freundlich fitted (red line) for N<sub>2</sub> (violet circle) isotherm measure at 263 K.

**Table S2.** Summary of parameters for the DSLF isotherm model.

| Parameter<br>→<br>Adsorbates<br>↓ | $q_{m1}$<br>(mmol/g) | $b_1$<br>(1/kPa) | $n_1$   | $q_{m2}$<br>(mmol/g) | $b_2$<br>(1/kPa) | $n_2$   |
|-----------------------------------|----------------------|------------------|---------|----------------------|------------------|---------|
| CH <sub>4</sub> (298 K)           | 0.02332              | 2.2068E-17       | 0.1196  | 1.27127              | 0.00931          | 0.96809 |
| CO <sub>2</sub> (298 K)           | 0.14471              | 1.51329E-6       | 0.35411 | 1.98371              | 0.04647          | 0.97357 |
| N <sub>2</sub> (298 K)            | 0.12043              | 0.01302          | 0.89336 | 0.59041              | 1.05795E-6       | 0.38817 |
| CH <sub>4</sub> (273 K)           | 0.01047              | 3.41124E-30      | 0.06833 | 1.34749              | 0.02251          | 0.98999 |
| CO <sub>2</sub> (273 K)           | 1.23464              | 0.01395          | 1.28967 | 1.75891              | 0.14174          | 0.84322 |
| N <sub>2</sub> (273 K)            | 0.06844              | 0.04982          | 0.92441 | 0.30157              | 4.88965E-4       | 0.57555 |
| CH <sub>4</sub> (263 K)           | 0.03442              | 0.0135           | 0.28901 | 1.39057              | 0.02733          | 0.98233 |
| CO <sub>2</sub> (263 K)           | 7.637                | 0.0021           | 1.45978 | 1.87787              | 0.30022          | 0.89763 |
| N <sub>2</sub> (263 K)            | 0.08555              | 0.04982          | 0.92441 | 0.37696              | 4.88965E-4       | 0.57555 |

**Table S3.** Comparison for the selectivity of CO<sub>2</sub>/N<sub>2</sub> and CO<sub>2</sub>/CH<sub>4</sub> with literature reports.

| Complex                                                                                      | Selectivity CO <sub>2</sub> /N <sub>2</sub> uptake |       |       | Selectivity CO <sub>2</sub> /CH <sub>4</sub> uptake |       |       | References                                           |
|----------------------------------------------------------------------------------------------|----------------------------------------------------|-------|-------|-----------------------------------------------------|-------|-------|------------------------------------------------------|
|                                                                                              | 298 K                                              | 273 K | 263 K | 298 K                                               | 273 K | 263 K |                                                      |
| Zn-CBS                                                                                       | 408                                                | 916   | 1832  | 12.2                                                | 17.2  | 24.5  | This work                                            |
| JUC-141                                                                                      | 27.6                                               | 21.6  |       | 8.72                                                | 4.20  |       | <i>Inorg. Chem.</i> , 2017, <b>56</b> , 6938-6942    |
| SNU-150,<br>SNU-77S,<br>SNU-151,<br>and<br>SNU-100                                           | 5.4,<br>30,<br>and<br>26.5                         |       |       | 2.26,<br>7.20                                       |       |       | <i>Chem. Eur. J.</i> , 2013, <b>19</b> , 17432–17438 |
| [Zn(atz) <sub>2</sub> ]                                                                      | 225                                                | 403   |       | 5.8                                                 | 7.5   |       | <i>Inorg. Chem.</i> , 2012, <b>51</b> , 9950-9955    |
| IITKGP-5                                                                                     | 147.8                                              | 435.5 |       | 23.8                                                | 151.6 |       | <i>Dalton Trans.</i> , 2017, <b>46</b> , 15280–15286 |
| IITKGP-6                                                                                     | 42.8                                               | 51.3  |       | 5.1                                                 | 36    |       | <i>Inorg. Chem.</i> , 2017, <b>56</b> , 13991-13997  |
| IISERP-MOF20                                                                                 | 250                                                | 220   |       |                                                     |       |       | <i>Inorg. Chem.</i> , 2018, <b>57</b> , 5267-5272    |
| MAF-66                                                                                       | 225                                                | 403   |       | 5.8                                                 | 7.5   |       | <i>Chem. Commun.</i> , 2014, <b>50</b> , 12101-12104 |
| UTSA-49a                                                                                     | 93.5                                               | 193.7 |       | 33.7                                                | 34.8  |       |                                                      |
| (Me <sub>2</sub> NH <sub>2</sub> ) <sub>2</sub> [(In <sub>2</sub> X)]·9DMF·5H <sub>2</sub> O |                                                    | 250   |       | 5.6                                                 | 6.4   |       | <i>Inorg. Chem.</i> , 2013, <b>52</b> , 3127-3132    |
| NOTT-202a                                                                                    | 4.3                                                | 26.7  |       | 1.4                                                 | 2.9   |       | <i>Nat. Mater.</i> , 2012, <b>11</b> , 710-716       |
| UTSA-15a,<br>UTSA-20a,<br>UTSA-25a,<br>UTSA-33a,<br>and<br>UTSA-34a                          |                                                    |       |       | 14.2,<br>8.3,<br>9.4,<br>7.0,<br>and<br>5.1         |       |       | <i>Nat. Commun.</i> , 2012, <b>3</b> , 954-963       |

### **Density Functional Theory (DFT) and Configurational Bias Monte Carlo (CBMC) molecular simulation:**

Ligand H<sub>3</sub>(D-2,4-cbs) was optimized in DFT and put in a (1 x 1 x 1) cell for further calculation. The simulation boxes representing the ligand consist of (1 x 1 x 1) unit cells for CO<sub>2</sub>, N<sub>2</sub> and CH<sub>4</sub> (optimized). All the calculations were performed at 298 K at fixed pressure 1 bar. Interatomic interactions were modeled with standard Lennard-Jones potential and Columbic potentials. Lorentz-Berthelot mixing rules were employed to compute the Lennard-Jones parameters between unlike atom types. The pairwise interactions between host and guest atoms of the particular force field were analysed by utilizing the non-bonding parameter. The long-range part of electrostatic interactions was handled using the Ewald summation technique with a relative precision of 10<sup>-6</sup>. Periodic boundary conditions were applied in all three dimensions. For each state point, the CBMC simulation consists of 1 x 10<sup>7</sup> steps to guarantee equilibration, followed by 1 x 10<sup>7</sup> steps to sample the desired thermodynamic properties.

**Table S4.** Calculation of number of molecules absorbed per formula unit of Zn-CBS based on TGA.

| <b>Solvent</b>  | <b>Found (wt%)</b> | <b>Calculated (wt%)</b> | <b>Number of guest molecules</b> |
|-----------------|--------------------|-------------------------|----------------------------------|
| Acetonitrile    | 15.0               | 14.6                    | 3.75                             |
| Ethanol         | 15.0               | 15.2                    | 3.5                              |
| Methanol        | 8.9                | 8.9                     | 2.75                             |
| Tetrahydrofuran | 12.5               | 12.3                    | 1.75                             |
| Toluene         | 18.2               | 17.7                    | 2.1                              |
| p-Xylene        | 14.7               | 15.0                    | 1.5                              |
